# Supplementary material for: Diagnosing ozone–NO x –VOC sensitivity and revealing causes of ozone increases in China based on 2013–2021 satellite retrievals
Source: Copernicus journal article supplement (doi:10.5194/acp-22-15035-2022), 2022-11-25
Supplement: Supplementary file 1 [file acp-22-15035-2022-supplement.pdf]

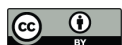

*Supplement of*

## **Diagnosing ozone–NO<sub>x</sub>–VOC sensitivity and revealing causes of ozone increases in China based on 2013–2021 satellite retrievals**

**Jie Ren et al.**

*Correspondence to:* Shaodong Xie (sdxie@pku.edu.cn)

The copyright of individual parts of the supplement might differ from the article licence.

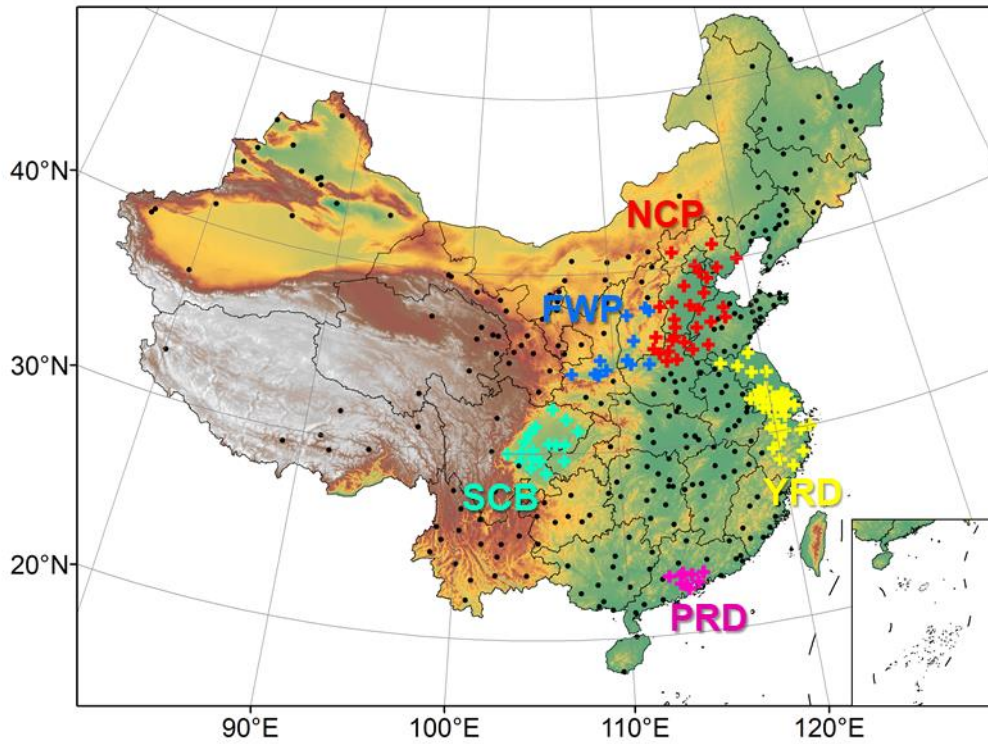

**Figure S1.** Location of cities and key regions, including city clusters of North China Plain (NCP), Yangtze River Delta (YRD), Fenwei Plain (FWP), Sichuan Basin (SCB), and Pearl River Delta (PRD).

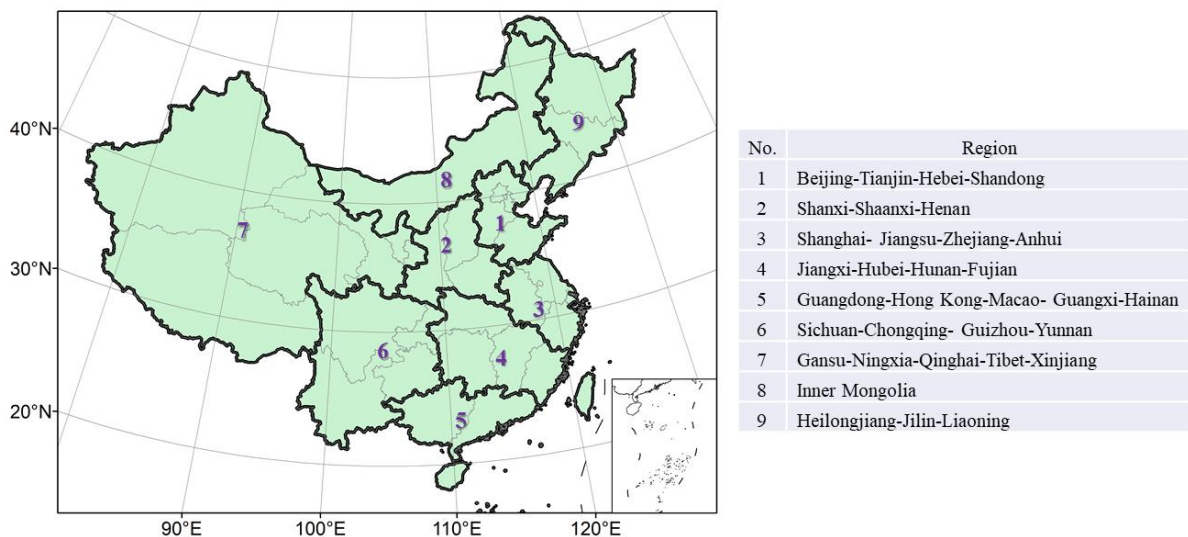

**Figure S2.** Map of the nine regions into which China is divided in this study.

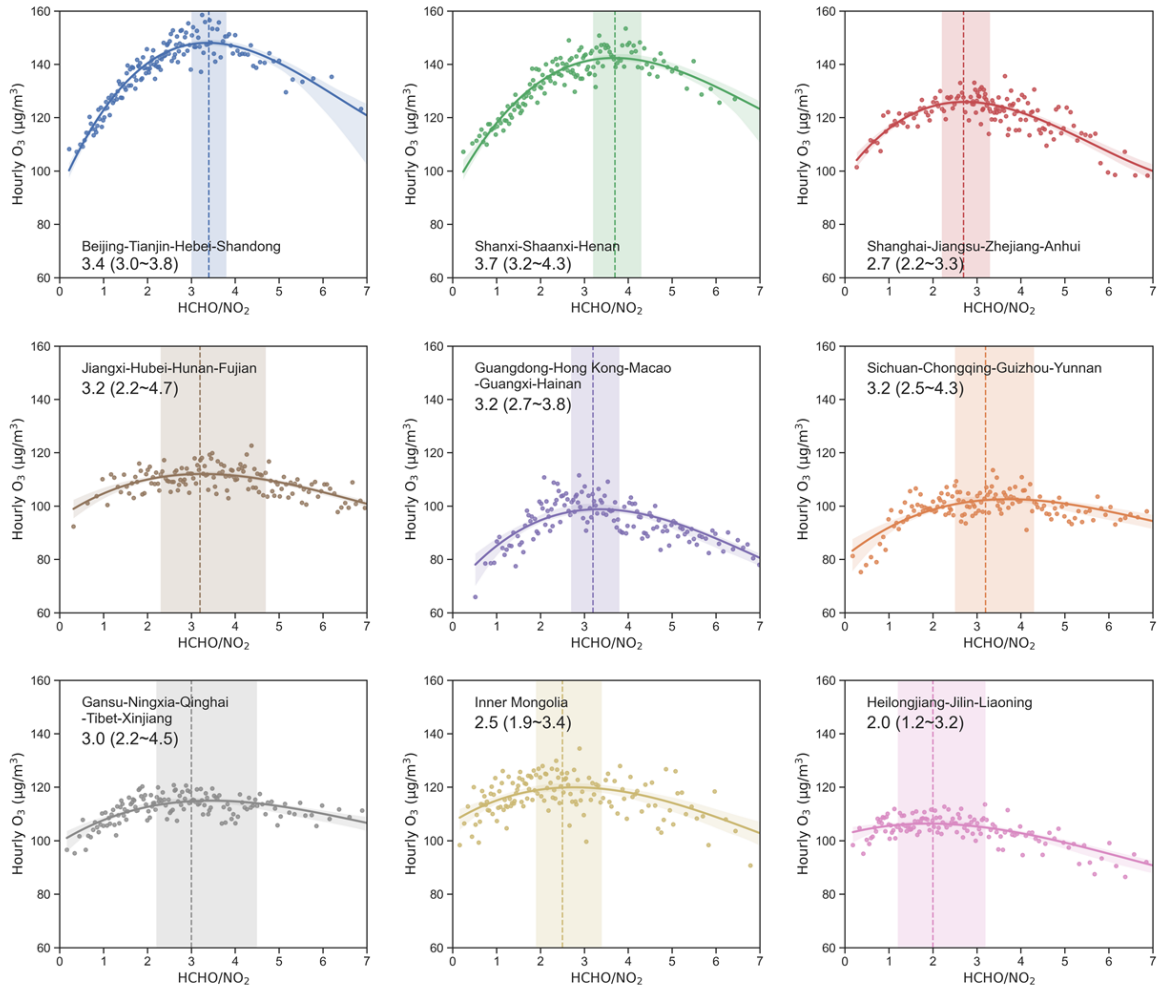

**Figure S3.** The same as Figure 3b but plotted with individual panels for nine regions in China.

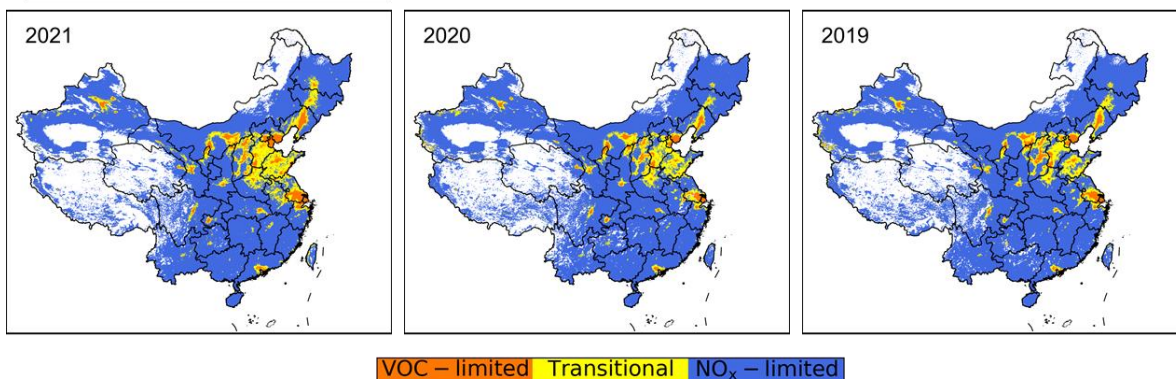

**Figure S4.** Ozone sensitivity classification over China from April to September 2019–2021 using the same HCHO/NO<sub>2</sub> threshold across China. Only polluted regions are displayed (defined as average TROPOMI NO<sub>2</sub> columns higher than  $1.0 \times 10^{15}$  molecules/cm<sup>2</sup>).

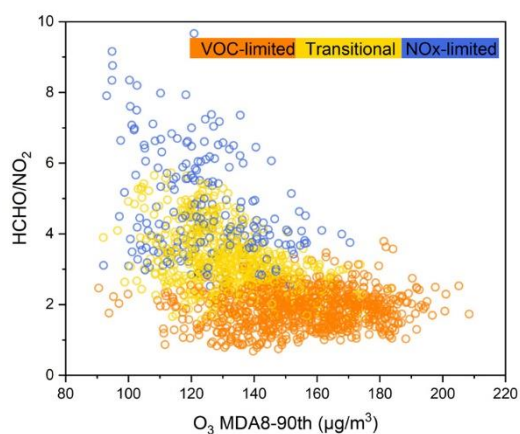

**Figure S5.** The 90th percentile of MDA8-O<sub>3</sub> and ozone sensitivity regime for all monitoring sites in 2021

Satellite NO<sub>2</sub> (10<sup>15</sup> molec/cm<sup>2</sup>)

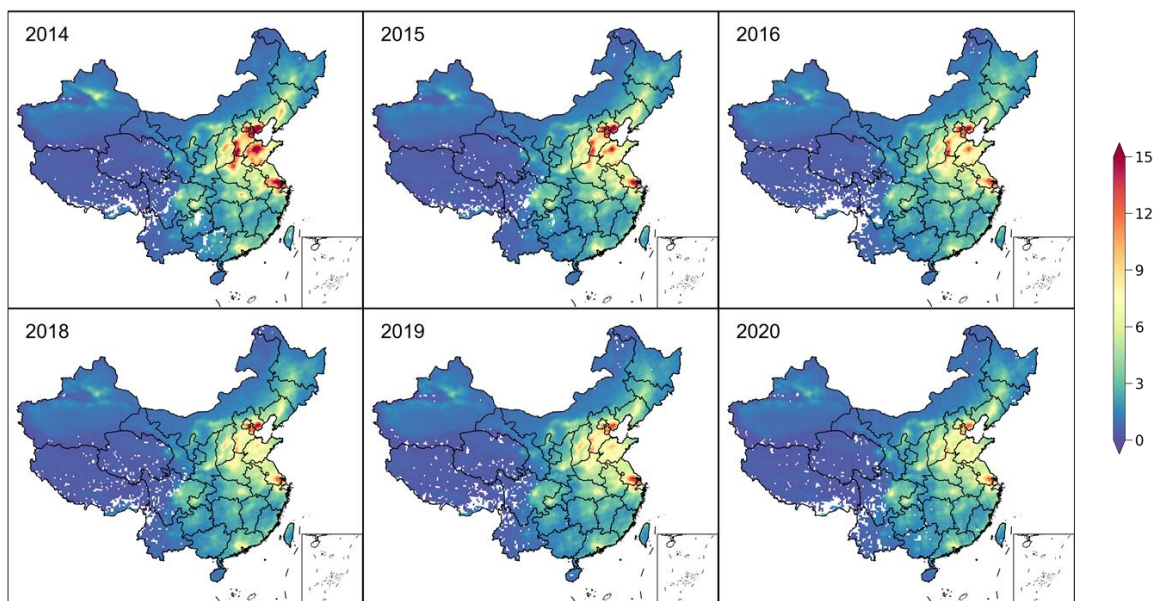

**Figure S6.** The same as Fig. 5a but for 2014-2016 and 2018-2020.

Satellite HCHO (10<sup>15</sup> molec/cm<sup>2</sup>)

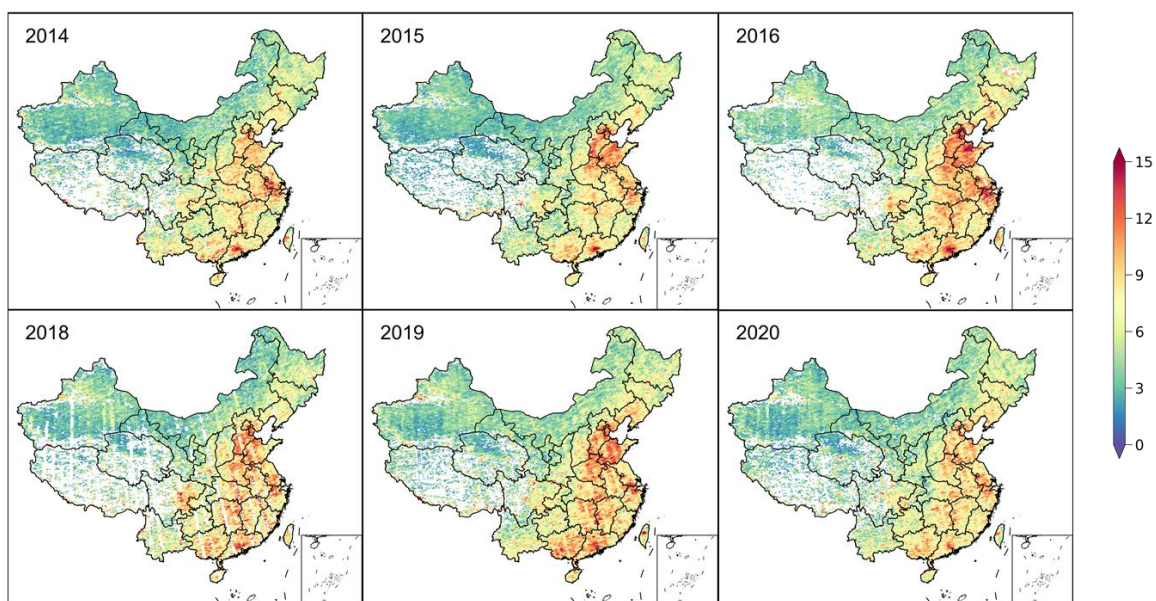

**Figure S7.** The same as Fig. 6a but for 2014-2016 and 2018-2020.

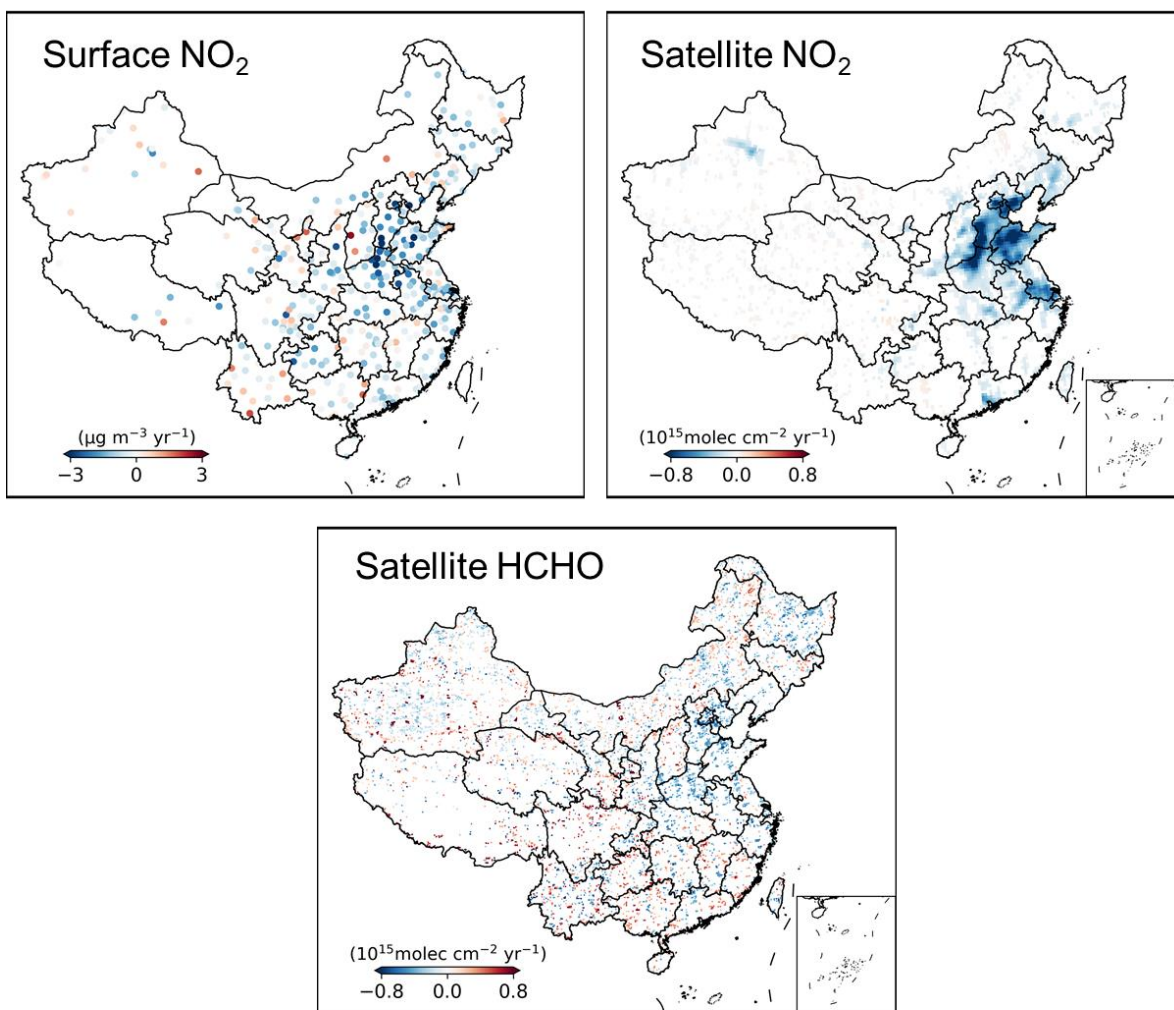

**Figure S8.** Trends in April-September average surface NO<sub>2</sub> concentrations in 2015-2021, and trends in April-September average satellite NO<sub>2</sub> and HCHO columns in 2013-2021 with  $p < 0.05$ .

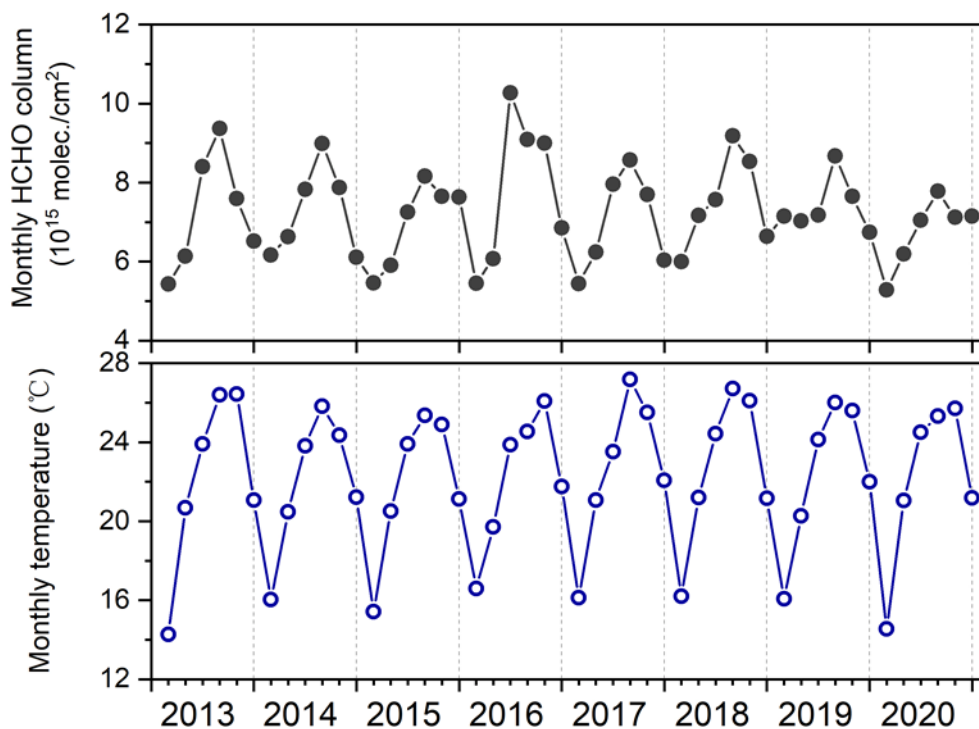

**Figure S9.** Time series of monthly mean HCHO columns and temperature in eastern China from April-September 2013-2020.

(Temperature data source: Yearbook of Meteorological Disasters in China)

**Table S1.** Proportions of O<sub>3</sub> sensitivity regimes in four megacity clusters<sup>a</sup> from April to September of 2021

| Region       | NCP   | YRD   | PRD   | SCB   |
|--------------|-------|-------|-------|-------|
| VOC-limited  | 59.2% | 23.5% | 8.0%  | 4.3%  |
| Transitional | 26.7% | 31.4% | 11.0% | 27.4% |
| NOx-limited  | 14.1% | 45.1% | 81.1% | 68.3% |

<sup>a</sup> The four megacity clusters are NCP (Beijing, Tianjin, Hebei, Shanxi, Henan, and Shandong), YRD (Shanghai, Zhejiang, and Jiangsu), PRD (Guangdong), and SCB (Chongqing and eastern Sichuan).
